# Supplementary material
Source: MDPI journal article supplement (https://www.mdpi.com/1424-8247/16/12/1731)
Supplement: s1 [file s1]

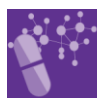

# Antimicrobial, Anticancer, and Antioxidant Activities of Maize and Clover Pollen Grains Extracts: A Comparative Study with Phytochemical Characterizations

Heba Barnawi <sup>1</sup>, Husam Qanash <sup>1,2</sup>, Abdu Aldarhami <sup>3</sup>, Ghaida Alsaif <sup>1</sup>, Bandar Alharbi <sup>1</sup>, Majed N. Almashjary <sup>4,5</sup>, Alhomidi Almotiri <sup>6</sup>, Abdulrahman S. Bazaid <sup>1,2,\*</sup>

<sup>1</sup> Department of Medical Laboratory Science, College of Applied Medical Sciences, University of Ha'il, Hail 55476, Saudi Arabia; h.barnawi@uoh.edu.sa (H.B.); h.qanash@uoh.edu.sa (H.Q.); g.alsaif@uoh.edu.sa (G.A.); b.alharbi@uoh.edu.sa (B.A.); ar.bazaid@uoh.edu.sa (A.S.B.)

<sup>2</sup> Medical and Diagnostic Research Center, University of Ha'il, Hail 55473, Saudi Arabia

<sup>3</sup> Department of Medical Microbiology, Qunfudah Faculty of Medicine, Umm Al-Qura University, Al-Qunfudah 21961, Saudi Arabia; ahdarhami@uqu.edu.sa (A.A.)

<sup>4</sup> Department of Medical Laboratory Sciences, Faculty of Applied Medical Sciences, King Abdulaziz University, Jeddah 22254, Saudi Arabia; malmashjary@kau.edu.sa (M.N.A.)

<sup>5</sup> Hematology Research Unit, King Fahd Medical Research Center, King Abdulaziz University, Jeddah 22254, Saudi Arabia

<sup>6</sup> Department of Clinical Laboratory Sciences, College of Applied Medical Sciences-Dawadmi, Shaqra University, Dawadmi 17464, Saudi Arabia; hsalmutiri@su.edu.sa (A.A.)

\* Correspondence: ar.bazaid@uoh.edu.sa (A.S.B.)

## This document includes:

- Supplementary figures:

Figure S1: Chromatogram of detected phenolic and flavonoid compounds in maize via HPLC.

Figure S2: Chromatogram of detected phenolic and flavonoid compounds in clover via HPLC.

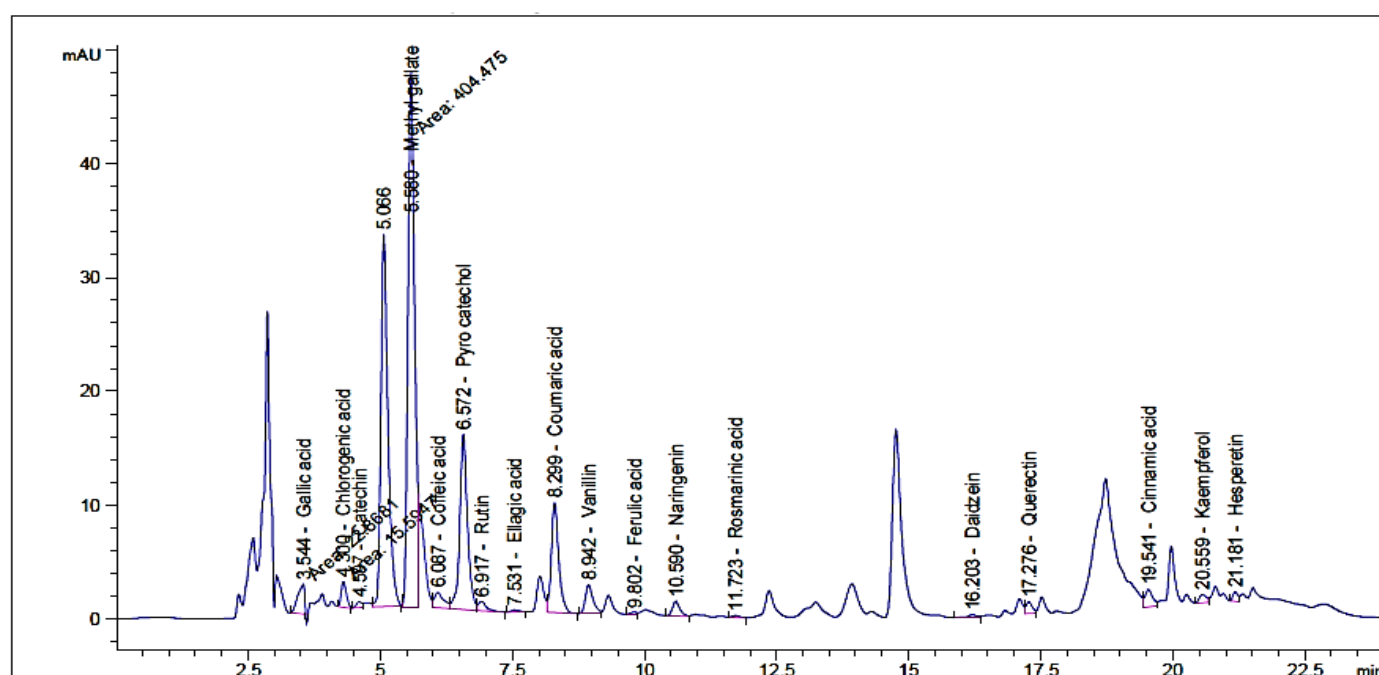

**Figure S1.** Chromatogram of detected phenolic and flavonoid compounds in maize via HPLC.

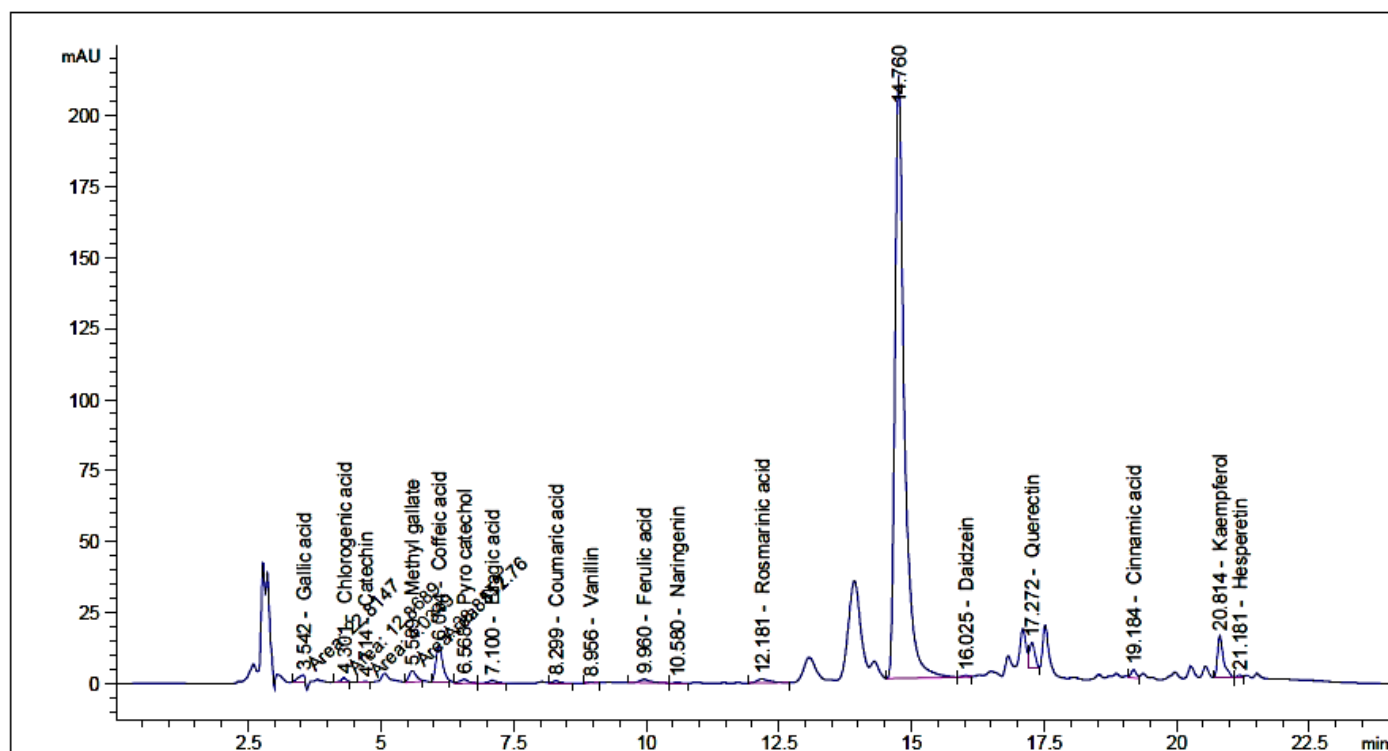

**Figure S2.** Chromatogram of detected phenolic and flavonoid compounds in clover via HPLC.
